# Supplementary material
Source: bioRxiv or medRxiv preprint supplement (https://www.biorxiv.org/highwire/filestream/73188/field_highwire_adjunct_files/10/091512-9.pdf)

**Figure S9A**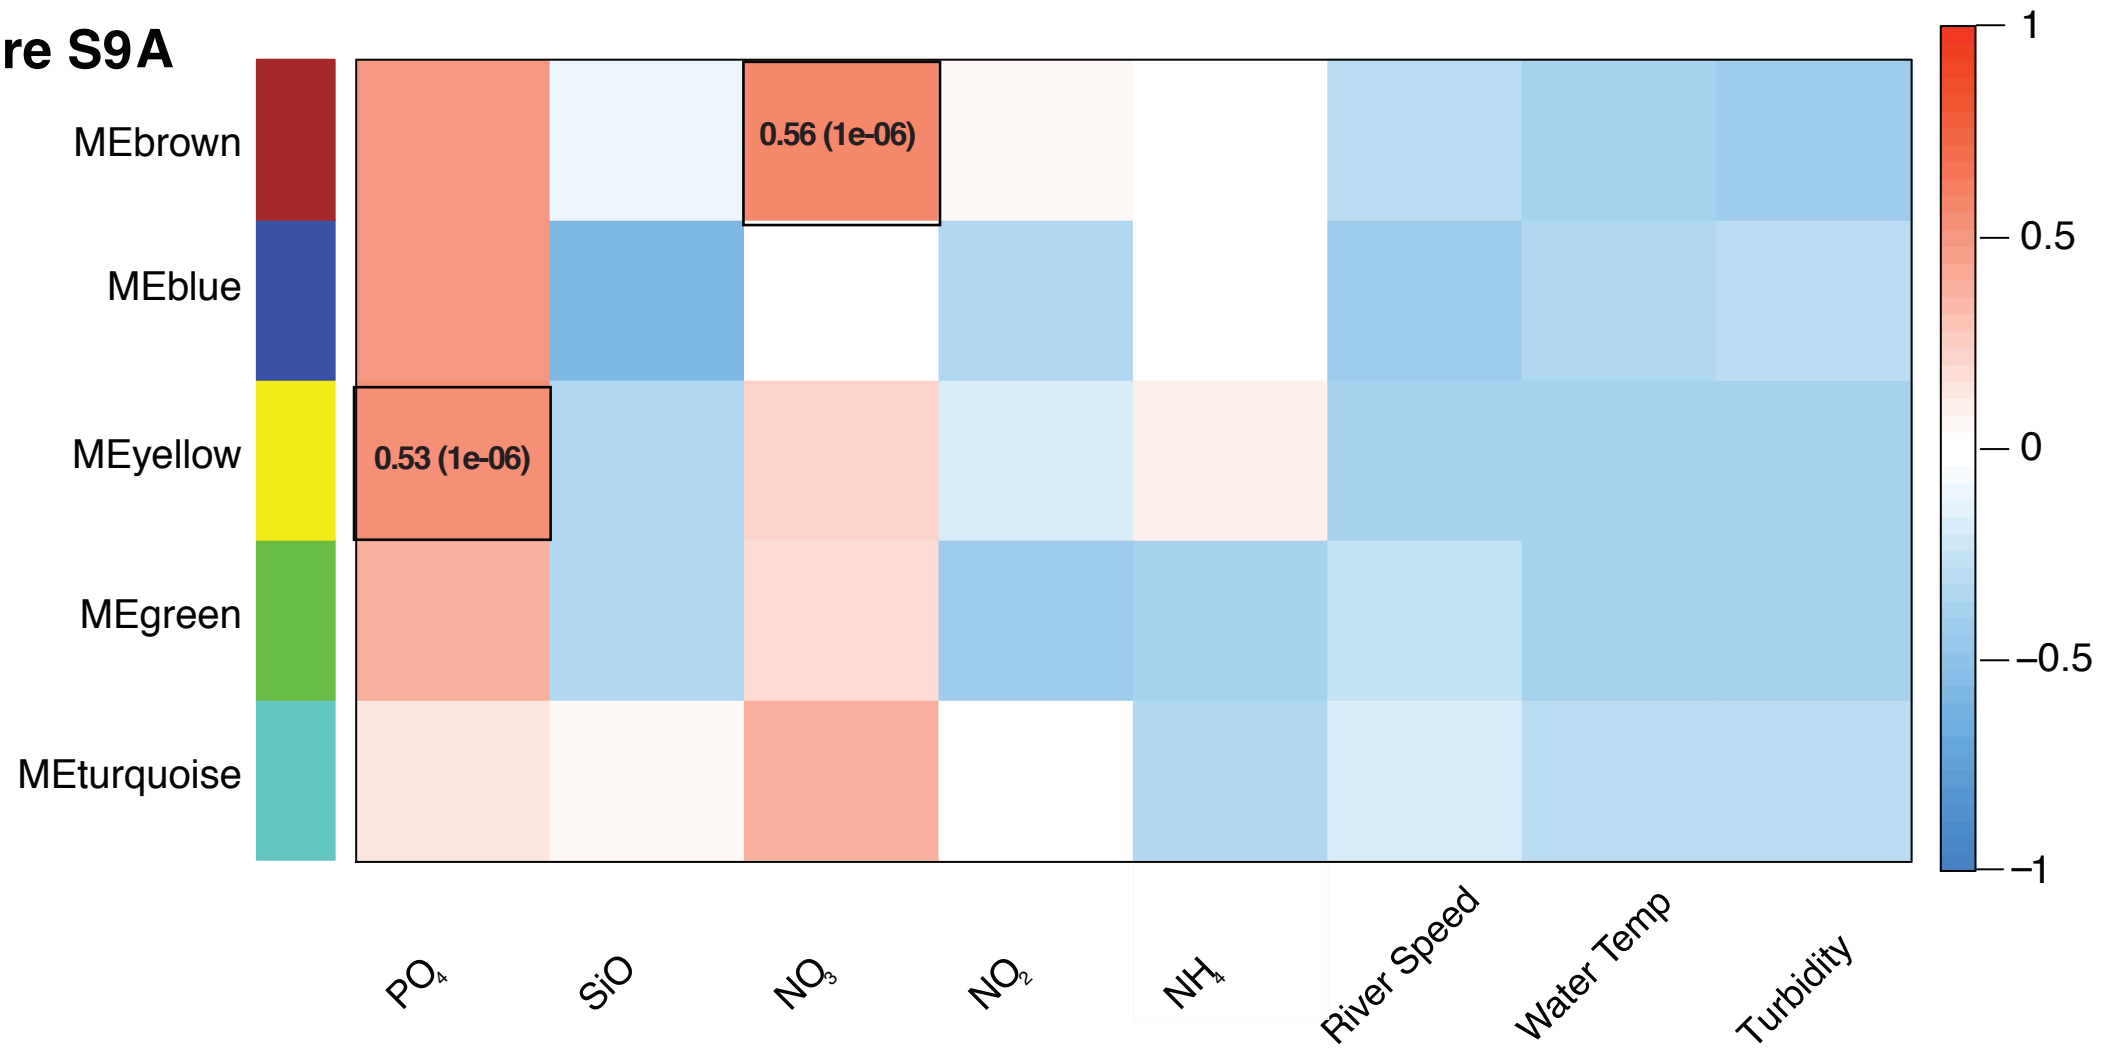**B****Module membership vs. population significance**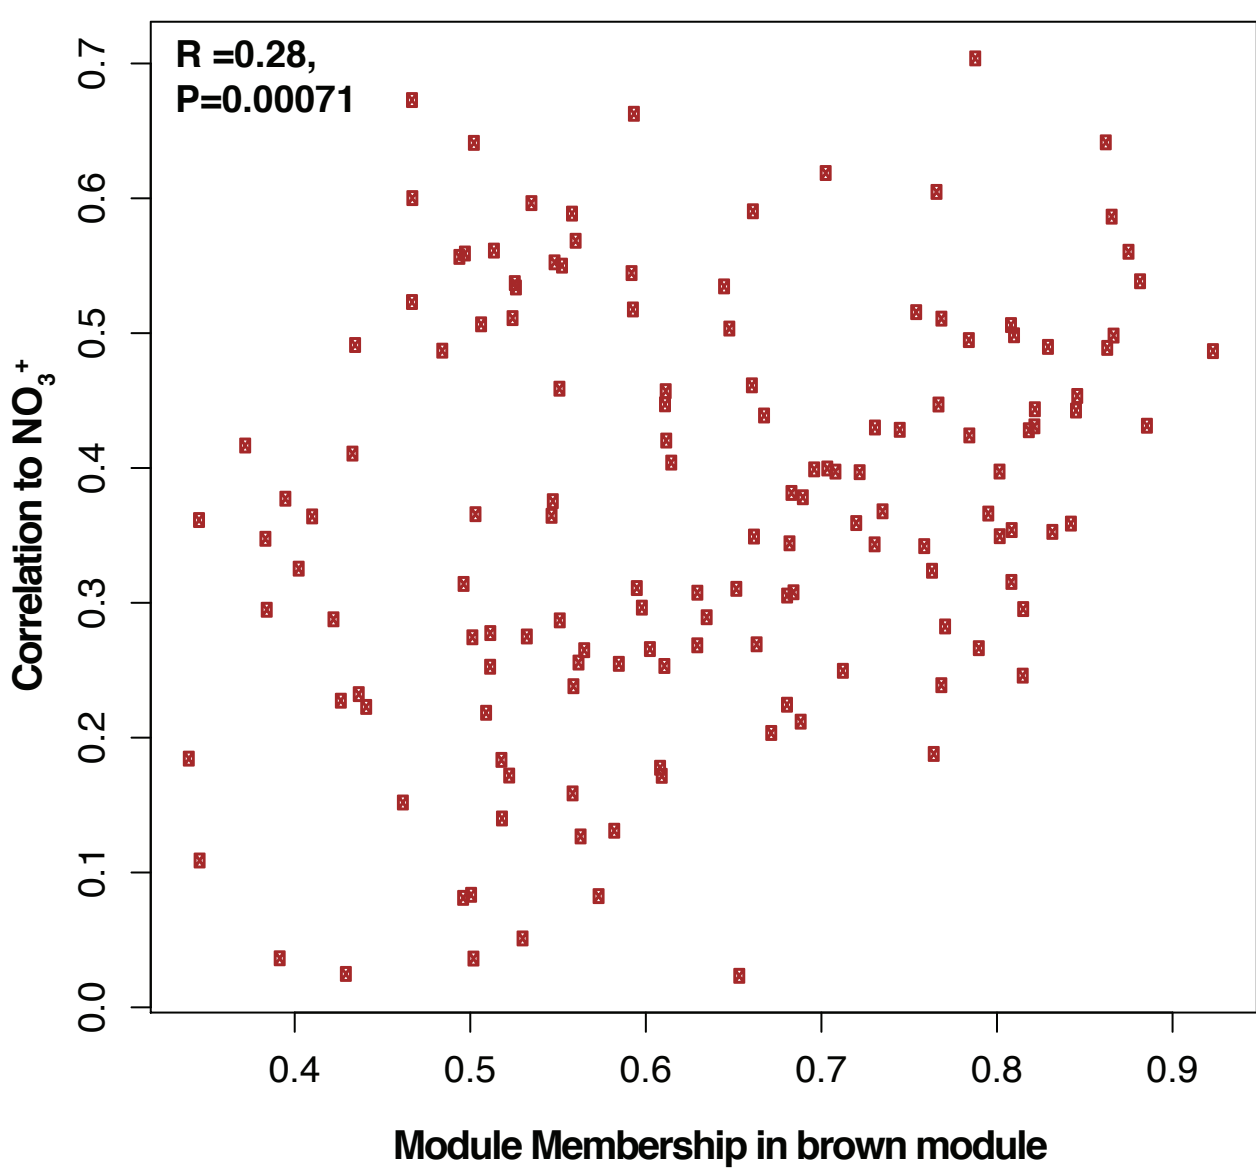**D****Module membership vs. population significance**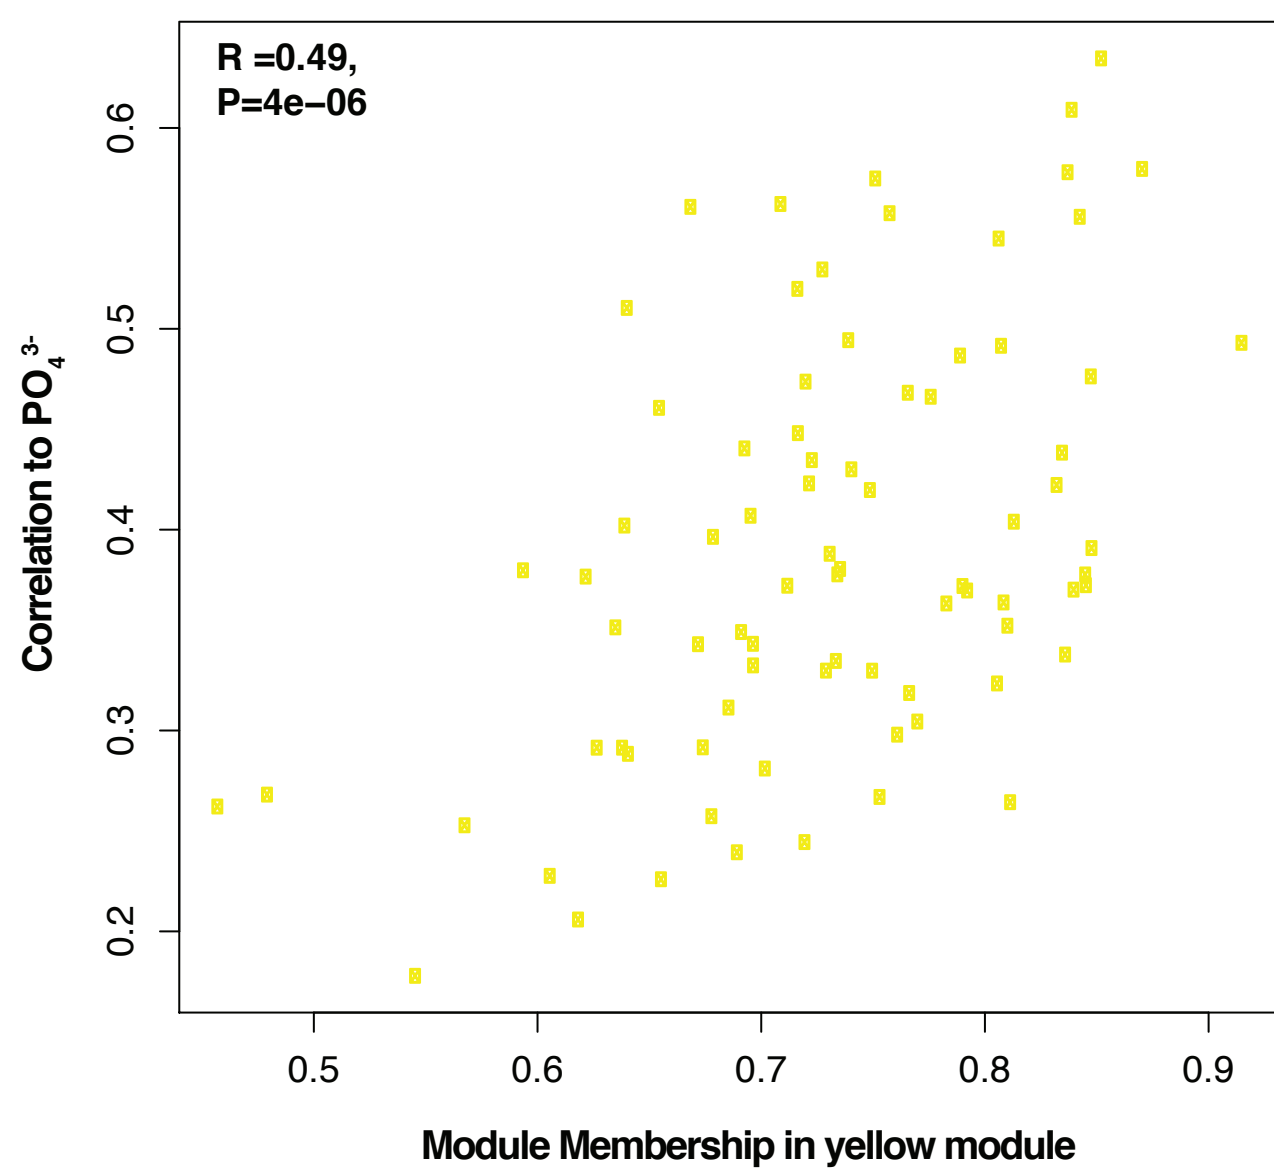**C****Comparison of NO<sub>3</sub><sup>+</sup> measured vs predicted for module brown**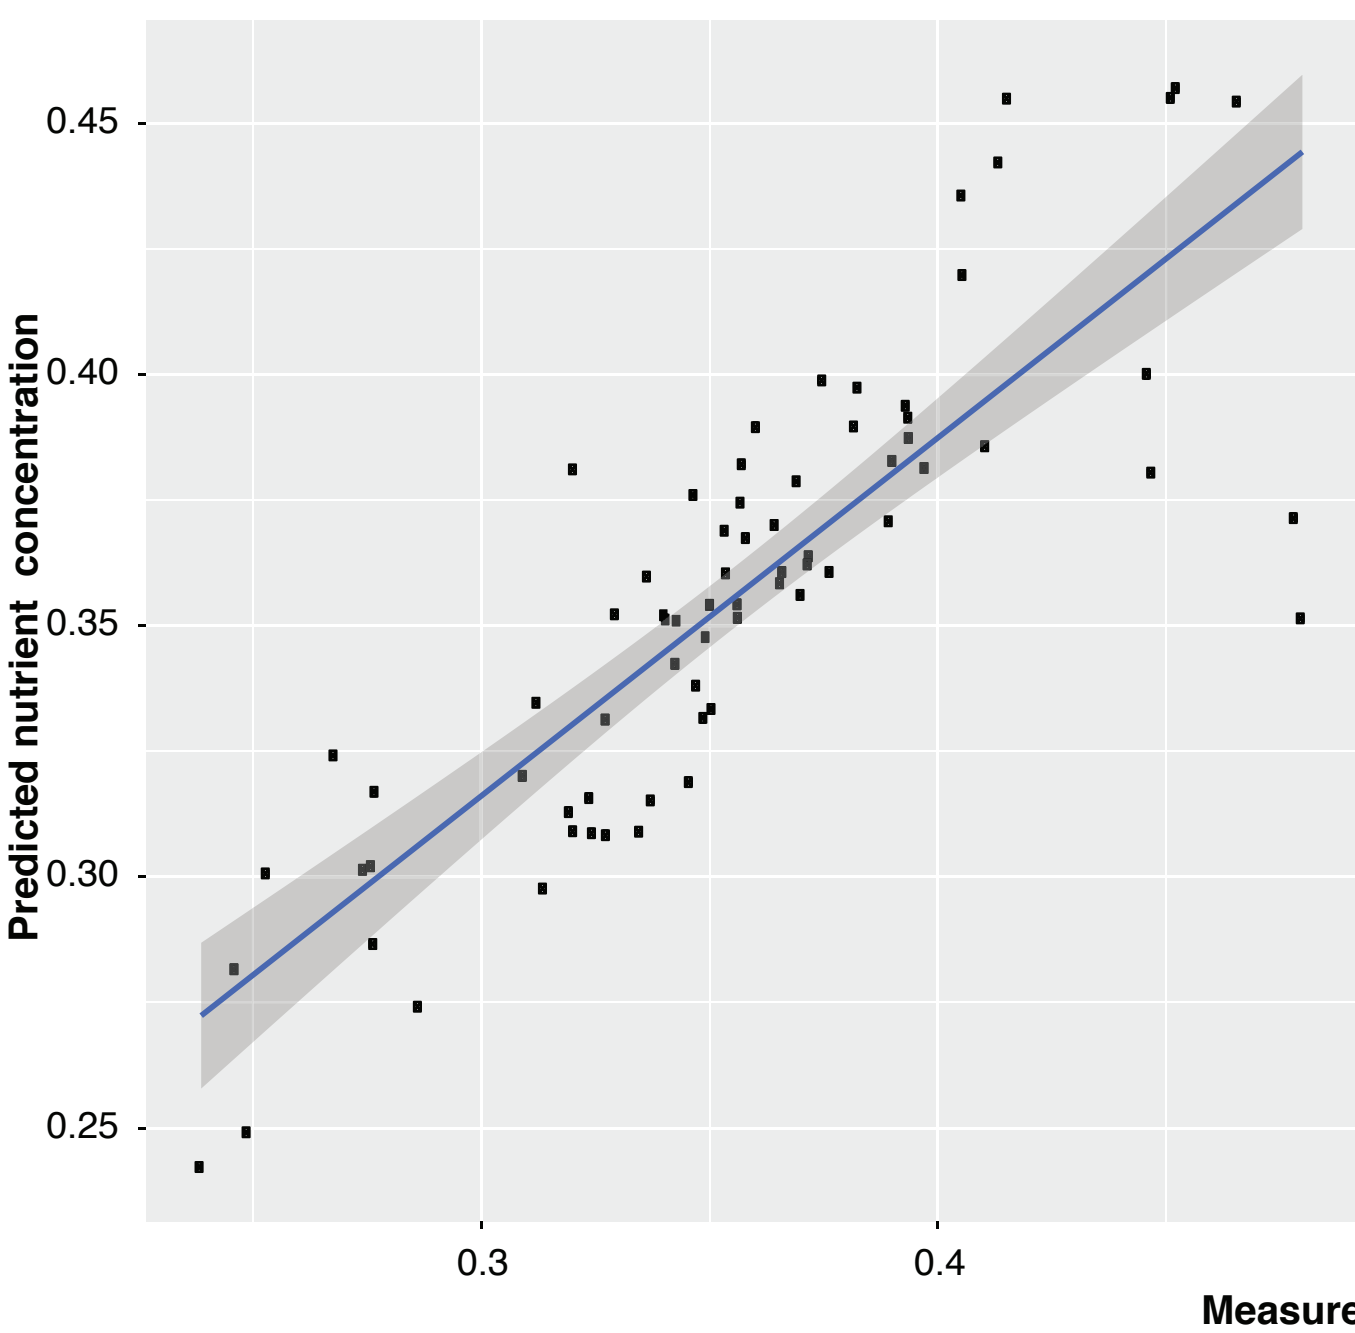**E****Comparison of PO<sub>4</sub><sup>3-</sup> measured vs. predicted for module yellow**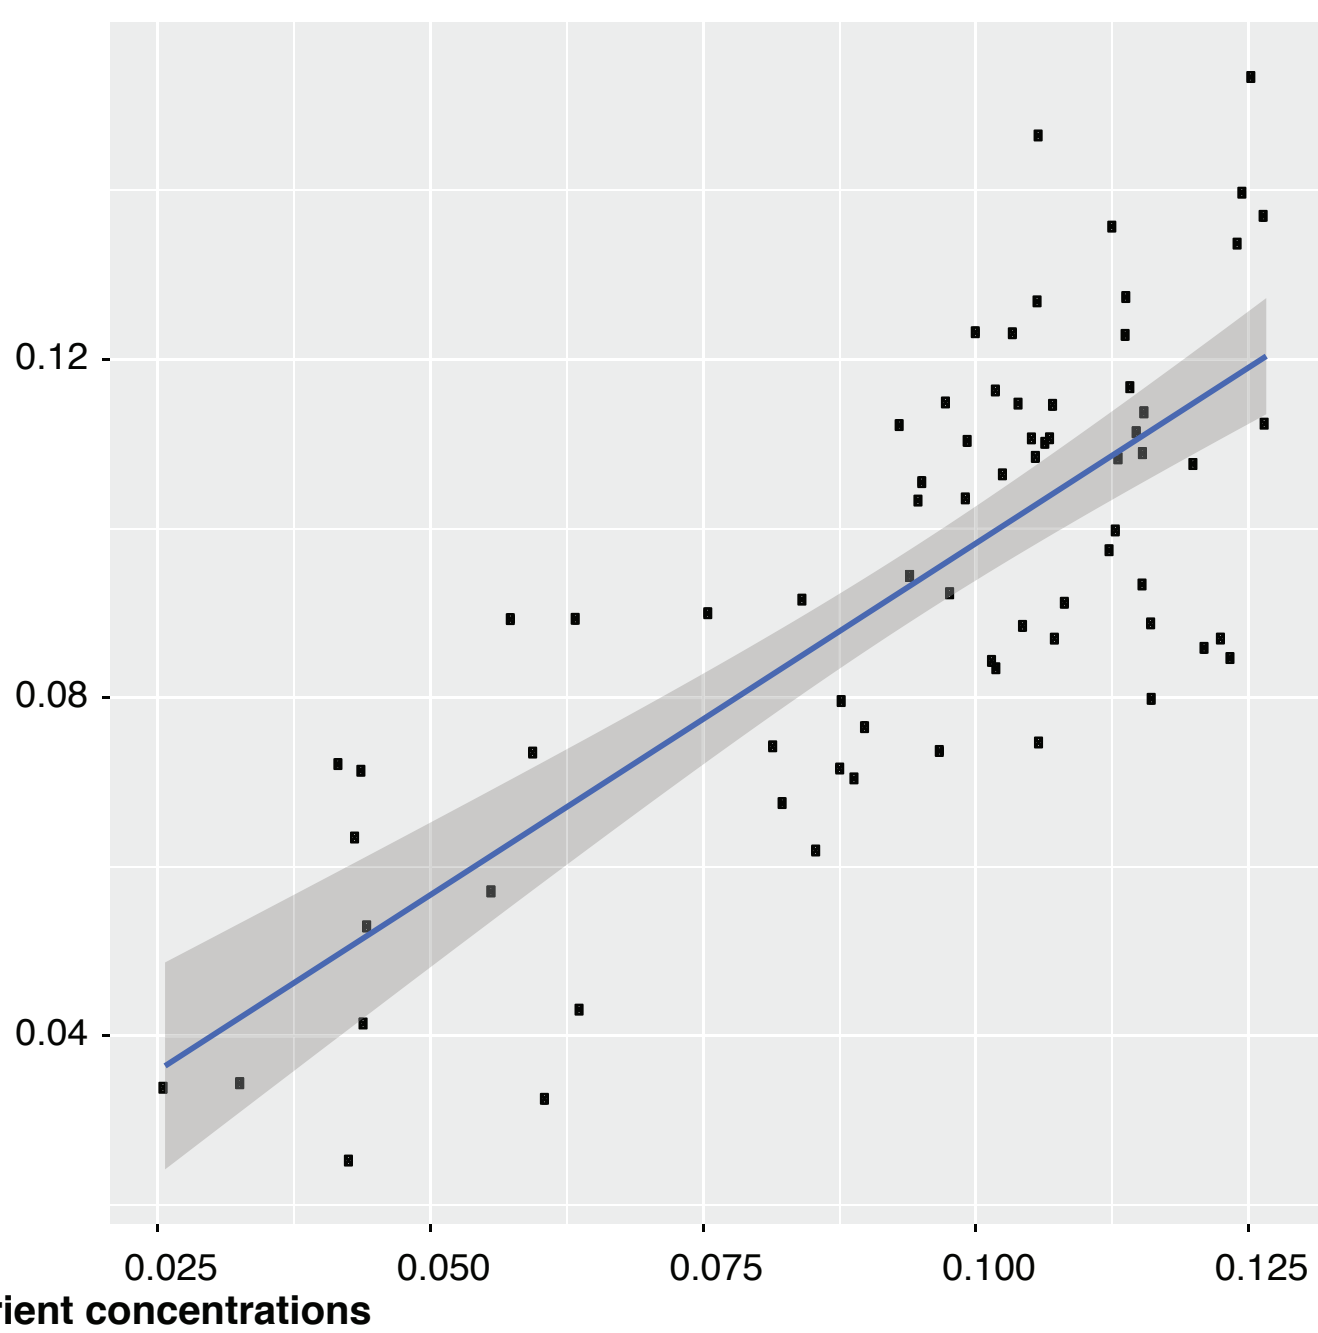

Supplement: Supplementary file [file 091512-9.pdf]
